# Supplementary material for: High-performance UV-activated room temperature NO2 sensors based on TiO2/In2O3 composite
Source: Royal Society of Chemistry journal article supplement (doi:10.1039/d3ce00004d), 2023-01-01
Supplement: d3ce00004d1.pdf [file d3ce00004d1.pdf]

## Electronic Supporting Information (ESI)

### High-performance UV-activated room temperature NO<sub>2</sub> sensors based on TiO<sub>2</sub>/In<sub>2</sub>O<sub>3</sub> composite

*Zhicheng Cai<sup>a</sup>, Jiho Park<sup>b</sup>, Doyeon Jun<sup>c</sup>, Sunghoon Park<sup>c,d\*</sup>*

*<sup>a</sup> Department of Software Convergence, Sejong University, 209 Neungdong-ro, Gwangjin-gu, Seoul, South Korea*

*<sup>b</sup> Department of Electronics and Information Engineering, Sejong University, 209 Neungdong-ro, Gwangjin-gu, Seoul, South Korea*

*<sup>c</sup> Department of Intelligent and Mechatronics Engineering, Sejong University, 209 Neungdong-ro, Gwangjin-gu, Seoul, South Korea*

*<sup>d</sup> Department of Semiconductor System Engineering, Sejong University, 209 Neungdong-ro, Gwangjin-gu, Seoul, South Korea*

*Corresponding authours. Ph.D Sunghun Park, E-mail: s.park@sejong.ac.kr*

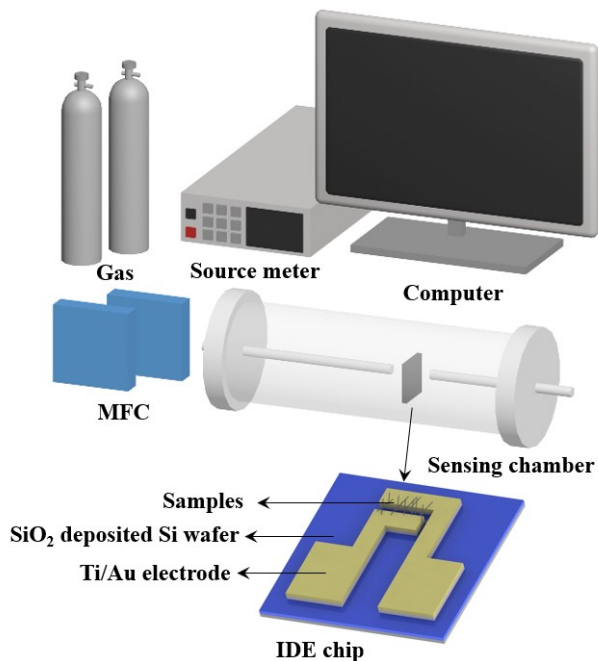

**S1.** The IDE chip with 10 nm Ti adhesion layer and 100 nm Au conduction layer on SiO<sub>2</sub>-deposited Si wafer substrate and homemade gas sensing system.

| Sample | In 3d <sub>5/2</sub><br>binding energy<br>(eV) | In 3d <sub>3/2</sub><br>binding energy<br>(eV) | Ti 2p <sub>3/2</sub><br>binding energy<br>(eV) | Ti 2p <sub>1/2</sub><br>binding energy<br>(eV) |
|--------|------------------------------------------------|------------------------------------------------|------------------------------------------------|------------------------------------------------|
| S0     | 444.93                                         | 452.47                                         | -                                              | -                                              |
| S1     | 444.61                                         | 452.15                                         | 457.29                                         | 462.83                                         |
| S2     | 444.42                                         | 451.96                                         | 457.31                                         | 462.85                                         |
| S3     | 443.90                                         | 451.44                                         | 257.98                                         | 463.52                                         |

**Table 1.** Binding energies of the In 3d and Ti 2p peaks for different samples determined using XPS.

| Sample | $O_{\text{lattice}}$<br>binding<br>energy<br>(eV) | $O_{\text{vac}}$<br>binding<br>energy<br>(eV) | $O_{\text{abs}}$<br>binding<br>energy<br>(eV) | $O_{\text{lattice}}$<br>percentage<br>(%) | $O_{\text{vac}}$<br>percentage<br>(%) | $O_{\text{abs}}$<br>percentage<br>(%) |
|--------|---------------------------------------------------|-----------------------------------------------|-----------------------------------------------|-------------------------------------------|---------------------------------------|---------------------------------------|
| S0     | 529.36                                            | 530.96                                        | 532.16                                        | 76.02                                     | 19.70                                 | 4.28                                  |
| S1     | 530.29                                            | 531.90                                        | 533.10                                        | 66.15                                     | 24.62                                 | 9.23                                  |
| S2     | 530.23                                            | 531.94                                        | 533.07                                        | 59.87                                     | 38.08                                 | 2.05                                  |
| S3     | 530.20                                            | 531.80                                        | 533.01                                        | 65.02                                     | 28.33                                 | 6.65                                  |

**Table 2.** Binding energies and proportions of the three components of the O 1s peak for different samples determined using XPS.

| Material                                                    | Temperature<br>(°C) | Concentration<br>(ppm) | Response | Refs.     |
|-------------------------------------------------------------|---------------------|------------------------|----------|-----------|
| In <sub>2</sub> O <sub>3</sub> /rGO                         | RT                  | 30                     | 8.25     | [1]       |
| Walnut-like In <sub>2</sub> O <sub>3</sub>                  | RT                  | 3                      | 13       | [2]       |
| Mesoporous In <sub>2</sub> O <sub>3</sub> nanorod<br>arrays | RT                  | 1                      | 20.9     | [3]       |
| In <sub>2</sub> O <sub>3</sub> /ZnO                         | RT                  | 10                     | 29.1     | [4]       |
| In <sub>2</sub> O <sub>3</sub> /ZnO YS NFs                  | RT                  | 1                      | 6        | [5]       |
| TiO <sub>2</sub> /In <sub>2</sub> O <sub>3</sub> NFs        | RT                  | 5                      | 49.29    | This work |

**Table 3.** Comparison of the NO<sub>2</sub> sensing properties of previously reported In<sub>2</sub>O<sub>3</sub>-based nanostructures and TiO<sub>2</sub>/In<sub>2</sub>O<sub>3</sub> NFs of the present study at RT.

## **References**

1. F. Gu, R. Nie, D. Han and Z. Wang, *Sens. Actuator B Chem.*, 2015, **219**, 94-99.

2. H. Ma, L. Yu, X. Yuan, Y. Li, C. Li, M. Yin and X. Fan, *J. Alloy. Compd.*, 2019, **782**, 1121-1126.
3. Y. Shen, X. Zhong, J. Zhang, T. Li, S. Zhao, B. Cui, D. Wei, Y. Zhang and K. Wei, *Appl. Surf. Sci.*, 2019, **498**, 143873.
4. X. Liang, J. Zhang, L. Du and M. Zhang, *Sens. Actuator B Chem.*, 2021, **329**, 129230.
5. C. Han, X. Li, Y. Liu, X. Li, C. Shao, J. Ri, J. Ma and Y. Liu, *J. Hazard. Mater.*, 2021, **403**, 124093
